## Reproductive phasiRNAs in grasses are compositionally distinct from other classes of small RNAs

Parth Patel<sup>1,2</sup>, Sandra Mathioni<sup>2,4</sup>, Atul Kakrana<sup>1,2</sup>, Hagit Shatkay<sup>1,2,3</sup>, Blake C. Meyers<sup>4,5</sup>

<sup>1</sup> Center for Bioinformatics and Computational Biology, University of Delaware, Newark, DE 19714, USA.

<sup>2</sup> Delaware Biotechnology Institute, University of Delaware Newark, DE 19714, USA.

<sup>3</sup> Department of Computer and Information Sciences, University of Delaware, Newark, DE 19714, USA.

<sup>4</sup> Donald Danforth Plant Science Center, St. Louis, MO 63132, USA.

<sup>5</sup> University of Missouri – Columbia, Division of Plant Sciences, 52 Agriculture Lab, Columbia, MO 65211, USA.

### Author for correspondence:

Blake C. Meyers

Tel: +1 (314) 587-1422

Email: [bmeyers@danforthcenter.org](mailto:bmeyers@danforthcenter.org)

|                                                                |      |                                      |                                             |
|----------------------------------------------------------------|------|--------------------------------------|---------------------------------------------|
| Total word count (excluding summary, references, and legends): | 6458 | No. of figures:                      | 5 (Figs 1-5 in color)                       |
| Summary:                                                       | 199  | No. of tables:                       | 2                                           |
| Introduction:                                                  | 744  | No. of Supporting Information files: | 12 (Figs S1-S4; Table S1-S4; Methods S1-S4) |
| Material and Methods:                                          | 807  |                                      |                                             |
| Results:                                                       | 3941 |                                      |                                             |
| Discussion:                                                    | 928  |                                      |                                             |
| Acknowledgments:                                               | 38   |                                      |                                             |

## 1 **Summary and keywords**

- 2 • Little is known about the characteristics and function of reproductive phased, secondary,  
3 small interfering RNAs (phasiRNAs) in the Poaceae, despite the availability of  
4 significant genomic resources, experimental data, and a growing number of  
5 computational tools. We utilized machine-learning methods to identify sequence-based  
6 and structural features that distinguish phasiRNAs in rice and maize from other small  
7 RNAs (sRNAs).
- 8 • We developed Random Forest classifiers that can distinguish reproductive phasiRNAs  
9 from other sRNAs in complex sets of sequencing data, utilizing sequence-based (k-mers)  
10 and features describing position-specific sequence biases.
- 11 • The classification performance attained is >80% in accuracy, sensitivity, specificity, and  
12 positive predicted value. Feature selection identified important features in both ends of  
13 phasiRNAs. We demonstrated that phasiRNAs have strand specificity and position-  
14 specific nucleotide biases potentially influencing AGO sorting; we also predicted targets  
15 to infer functions of phasiRNAs, and computationally-assessed their sequence  
16 characteristics relative to other sRNAs.
- 17 • Our results demonstrate that machine-learning methods effectively identify phasiRNAs  
18 despite the lack of characteristic features typically present in precursor loci of other small  
19 RNAs, such as sequence conservation or structural motifs. The 5'-end features we  
20 identified provide insights into AGO-phasiRNA interactions; we describe a hypothetical  
21 model of competition for AGO loading between phasiRNAs of different nucleotide  
22 compositions.

23  
24 **Keywords:** machine learning, classification, feature selection, reproductive phasiRNAs,  
25 miRNAs, P4-siRNAs, heterochromatic siRNAs, plant small RNAs

## 26 27 **Introduction**

28 Molecular and genomic studies coupled with deep sequencing have identified roles of many  
29 endogenous non-coding RNAs (ncRNAs) and small RNAs (sRNAs) at numerous developmental  
30 stages in many organisms (Tisseur *et al.*, 2011; Guttman & Rinn, 2012; Axtell, 2013; Kung *et*  
31 *al.*, 2013; Borges & Martienssen, 2015). Flowering plants have three major classes of sRNAs, all

32 derived from ncRNAs: microRNAs (miRNAs), heterochromatic or Pol IV-dependent small  
33 interfering RNAs (P4-siRNAs), and phased, secondary, small interfering RNAs (phasiRNAs).  
34 This latter class has grown considerably with the discovery of germline-enriched, reproductive  
35 phasiRNAs most well described in the Poaceae, namely maize and rice (Johnson *et al.*, 2009;  
36 Komiya *et al.*, 2014; Zhai *et al.*, 2015b). Two classes of reproductive phasiRNAs are known: 21-  
37 nt pre-meiotic phasiRNAs that peak in abundance during somatic cell specification in maize (one  
38 week after anther initiation), and 24-nt meiotic phasiRNAs that peak during meiosis and are  
39 detectable until pollen maturation (one to two weeks after pre-meiotic phasiRNAs peak) (Zhai *et al.*,  
40 2015b). The timing, localization, and narrow developmental time window of accumulation of  
41 the 21- and 24-nt phasiRNAs is conserved in rice and maize (Fei *et al.*, 2016). While the  
42 biogenesis and spatiotemporal patterns of accumulation of these reproductive phasiRNAs are  
43 now well described, our understanding of their function is still limited.

44

45 An analogy can be drawn between phasiRNAs of grass anthers and the PIWI-interacting RNAs  
46 (piRNAs) of animals, in aspects such as their biogenesis, developmental timing, and enrichment  
47 in reproductive organs. piRNAs play crucial roles in transposable element (TE) silencing and  
48 germline development from flies to fish to mammals (Meister, 2013). Yet, plants have a highly  
49 elaborate RNA-directed DNA methylation pathway (RdDM) that effectively silences most TEs  
50 (Matzke & Mosher, 2014), thus their need for yet another TE-silencing pathway is debatable.  
51 Emerging evidence implicates plant reproductive phasiRNAs in development; for example,  
52 MEL1, a rice Argonaute (AGO), is required for normal anther development (Nonomura *et al.*,  
53 2007), and this AGO binds to 21-nt reproductive phasiRNAs (Komiya *et al.*, 2014). The  
54 functions and targets are yet to be determined for both 21- and 24-nt reproductive phasiRNAs,  
55 and it is not known whether they function in *cis* or *trans* (Song *et al.*, 2012a; Zhai *et al.*, 2015b).  
56 In fact, it is possible that they are merely decay products of more functionally relevant long  
57 ncRNA precursors. Understanding the role of phasiRNAs requires more detailed molecular and  
58 computational analyses that could also serve to direct future experiments. For example,  
59 identifying characteristic features or motifs that differentiate reproductive phasiRNAs from other  
60 sRNAs (miRNAs, P4-siRNAs, etc.) may provide clues as to their AGO loading or targets.

61

62 Work on animal piRNAs has used sequence-based characteristics to demonstrate their unique  
63 properties; significant insights have resulted from so-called *alignment-free approaches*. These  
64 methods use short nucleotide sequences, k-mers, and other features to distinguish between  
65 different types of sRNA sequences, and classify them into distinct groups. For example, Zhang *et al.*  
66 *al.*, 2011 developed a classifier that can distinguish piRNAs from non-piRNAs (miRNAs,  
67 snoRNAs, tRNAs, and lncRNAs) with precision over 90% and a recall over 60%, within a five-  
68 fold cross-validation. This work utilized data from five species including mice, humans, rats,  
69 fruit flies, and nematodes, effectively discriminating piRNAs. In a test of the validity of their  
70 classifier, Zhang *et al.* (2011) detected >87,000 of ~130,000 piRNAs, in a total set of >600,000  
71 sRNAs. Brayet *et al.* (2014) used a similar approach to identify piRNAs from sequences of  
72 several types (miRNAs, tRNAs, and 25-33 nt sequences from protein coding genes) in human  
73 and fruit flies with precision over 85% and a recall over 88%. As such, these alignment-free  
74 approaches are quite promising for characterizing subsets of sRNAs within large and complex  
75 pools of un-sorted sequences.

76

77 Our aim was to start with a set of known reproductive phasiRNAs (21- or 24-nt), develop and  
78 optimize a classification pipeline, and ultimately use this to sort previously unknown sequences  
79 from plants to find reproductive phasiRNAs from among other types of small RNAs. An  
80 additional product of this work was the sequence-based characteristics that comprise the output  
81 of the classifier, as these might identify novel aspects of reproductive phasiRNAs. In this work,  
82 we implemented machine-learning approaches to examine plant 21-nt pre-meiotic and 24-nt  
83 meiotic reproductive phasiRNAs, and to build a classifier that can automatically distinguish them  
84 from other sRNAs (i.e., miRNAs and P4-siRNAs). Our results provide insights into phasiRNA  
85 sequence composition profiles and biases, sequence-based and positional features, aspects of  
86 their biogenesis, features that may influence AGO sorting, predicted targets and possible  
87 functions.

88

## 89 **Methods**

### 90 *Classification via machine learning*

91 We use the Random Forest (“RF”) (Breiman, 2001) classification method, which is based on  
92 building an ensemble of decision trees. This method has proven effective for addressing a variety

93 of classification problems in bioinformatics (Yang *et al.*, 2010; Lertampaiporn *et al.*, 2014). We  
94 employed the WEKA implementation of RF (Frank *et al.*, 2016) to build the model for  
95 distinguishing phasiRNAs (to which we refer as the *positive* set) from non-phasiRNAs (the  
96 *negative* set). As we study two sets of reproductive phasiRNAs, characterized by two distinct  
97 lengths, namely 21- and 24-nt, for each set we have trained two distinct classifiers, one for each  
98 length. When training each of these classifiers, we have varied the composition of the negative  
99 sets of non-phasiRNAs to which the phasiRNAs were compared (more details are in the data set  
100 used for cross validation study, Method S1).

101

102 To train and test the classifiers we developed, we have used the commonly used stratified five-  
103 fold cross-validation (CV) framework (Kohavi, 1995). Under this framework, the dataset is  
104 partitioned into five subsets, where each subset has the same ratio of positive instances to  
105 negative instances as the whole dataset. Once the data is partitioned, five iterations of training  
106 and testing are performed, where in each iteration four parts of the data (80%) are used for  
107 training and the remaining part (20%) is used for testing. To ensure stability and reproducibility  
108 of the results, the whole five-fold CV experiment was repeated five times, each using a different  
109 five-way split (partition) of the dataset.

110

### 111 ***Performance evaluation***

112 To assess classification performance we use the standard measures of *accuracy* (ACC),  
113 *specificity* (SP), *sensitivity* (SE), *positive predictive value* (PPV), and *area under the receiver*  
114 *operating characteristic curve* (AUC), whose formulae and descriptions are as follows:

- 115 • Sensitivity  $SE = \frac{|TP|}{|TP|+|FN|}$  ;
- 116 • Specificity  $SP = \frac{|TN|}{|TN|+|FP|}$  ;
- 117 • Accuracy  $ACC = \frac{|TP|+|TN|}{|TP|+|TN|+|FP|+|FN|}$  ;
- 118 • Positive Predictive Value  $PPV = \frac{|TP|}{|TP|+|FP|}$  ;

119 where *True Positives* (TP) denotes the set of correctly classified phasiRNAs, *True*  
120 *Negatives* (TN) denotes the set of correctly classified non-phasiRNAs, *False Positives*  
121 (FP) denotes the set of non-phasiRNA sequences that were classified as phasiRNAs, and

122 *False Negatives* (FN) denotes the set of phasiRNA sequences that were not classified as  
123 such by our classifier. The number of items in the sets TP, TN, FP, and FN is denoted by  
124  $|TP|$ ,  $|TN|$ ,  $|FP|$ , and  $|FN|$ , respectively.

125 • The Area Under the ROC Curve (AUC) is an effective and joint measure of sensitivity  
126 and specificity, which is calculated by the Receiver Operating Characteristic curve  
127 (ROC). AUC determines the relative performance of classifiers for correctly classifying  
128 phasiRNAs and non-phasiRNAs. Values of AUC are between 0 (worst performance) and  
129 1 (best performance). ROC illustrates the true positive rate (sensitivity) against the false-  
130 positive rate (1 - specificity).

131

### 132 *Development of a machine learning classifier for plant small RNAs*

133 The classification pipeline we developed takes as input a set of plant small RNA sequences to  
134 assess for each sequence whether it has attributes or not of a reproductive phasiRNA, based on a  
135 training/test set, returning a “yes” or “no” response. Thus, for this decision, feature  
136 characterization is crucial. The pipeline used several sequence- and structural-based features.  
137 One known feature of reproductive phasiRNAs is a 5'-terminal cytosine, described for 21-nt  
138 phasiRNAs bound by MEL1, a rice Argonaute (Komiya *et al.*, 2014). Another known  
139 characteristic of both 21- and 24-nt reproductive phasiRNAs is their origin from unique or low  
140 copy regions in the genome (Johnson *et al.*, 2009; Zhai *et al.*, 2015b). Beyond these features,  
141 little was known about their sequence composition, true even for other classes of plant small  
142 RNAs.

143

144 Thus, to build a classifier, we utilized an alignment-free approach based on k-mers. These k-mer  
145 motifs (more details in Method S2), together with the GC content and Shannon entropy of the  
146 small RNA, comprised the sequence-based features of the classifier. The other major component  
147 of the classifier was a set of positional features, calculated for each sequence to determine the  
148 presence or absence of a given nucleotide in a determined sequence position. These two sets of  
149 attributes for each sequence comprised 1498 features, most of which were short k-mers or words  
150 that we could use to classify plant small RNAs. Before each classification, feature selection of  
151 the top 250 most informative features (of the 1498) was performed as a step to better understand  
152 which features play key roles in classifying phasiRNAs; this allowed us to reduce the feature

153 dimensionality comprising classification without compromising or negatively impacting the  
154 classifier's performance (more details in Method S2). We have also experimented with different  
155 number of trees and of features used. Consequently, to estimate the performance of the classifier,  
156 RF was applied using 100 trees, five out of 250 features assessed (five randomly sampled  
157 features selected as candidates at each split) at each split, and five complete runs of the 5-fold  
158 CV.

159  
160 The scripts used for this work are available on GitHub  
161 (<https://github.com/pupatel/phasiRNAClassifier>).

162

## 163 **Results**

### 164 *Cross validation results distinguishes reproductive phasiRNAs from other sRNAs*

165 We sought to identify unique attributes of rice and maize reproductive phasiRNAs relative to  
166 other, better-described small RNA classes. To do this, we developed a machine learning-based  
167 workflow focused on sequence-based and structural features of plant small RNAs (Fig. 1). To  
168 train the classifier, we used as positive examples known reproductive phasiRNAs from rice and  
169 maize, including both 21-nt and 24-nt phasiRNAs, while the negative sets consisted of P4-  
170 siRNAs, miRNAs, tRNAs, and rRNAs (see Method S1). We built and evaluated classifiers by  
171 utilizing different negative sets; the performance measurements were achieved via five-fold  
172 cross-validation (CV), and this 5-fold CV was completed five times on our datasets (see Methods  
173 for a more complete explanation). As noted above, the classification results were in terms of  
174 ACC, SE, SP, PPV, and AUC.

175

176 The results obtained from our classification pipeline using different negative sets, are shown in  
177 Table 1. The results, according to all performance measures, exceed 0.8 (with one exception, see  
178 below), for both 21- and 24-nt phasiRNAs. We first examined 21-nt phasiRNAs, and we  
179 compared phasiRNAs to a mixture of sRNAs that include selected miRNAs, P4-siRNA, tRNAs,  
180 and rRNAs; these latter four cases represent the four major negative sets (i.e. not phasiRNAs)  
181 found in a typical plant sRNA dataset (Table 1). In an initial comparison, the negative sets  
182 included miRNAs, tRNAs, and rRNAs of different lengths (randomly selected endogenous  
183 sequences); all P4-siRNAs were 24-nt. The classifier identified the combined negative set as

184 quite distinct relative to 21-nt phasiRNAs (Table 1). In addition, we computed the area under the  
185 ROC curve (AUC) (Fig. S1c), demonstrating the performance of the above-mentioned classifier  
186 with an averaged AUC of 0.97. Next, we combined untrimmed miRNAs and 24-nt P4-siRNAs  
187 and still achieved high classification performance (Table 1). This classification result could  
188 indicate that length is a primary factor in classification, and thus we used trimmed negative sets  
189 to assess this possibility.

190  
191 We classified 21-nt phasiRNAs relative to 24-nt P4-siRNAs with 3 nt trimmed from the 3' end  
192 (see Method S1); the classifier performed reasonably well ( $>0.8$  for all measurements, ACC, SP,  
193 SE, PPV, and AUC). We also trimmed P4-siRNAs 3 nt from the 5' end or from the internal 11<sup>th</sup>,  
194 12<sup>th</sup>, and 13<sup>th</sup> positions, observing no substantial changes in classification. We concluded that 21-  
195 nt reproductive phasiRNAs are compositionally distinct from P4-siRNAs. Finally, we related 21-  
196 nt phasiRNAs to 21-nt miRNAs (some trimmed, see Method S1), and found similar ACC, higher  
197 SE, but slightly lower SP and PPV; the lower SP may be attributed to fewer miRNAs (756 vs  
198 2000 21-nt phasiRNAs in the positive set). This imbalance possibly misclassified some miRNAs,  
199 hence low specificity and a high number of false positives (lower PPV). We followed the same  
200 procedure in classifying the 24-nt phasiRNAs, first with 24-nt P4-siRNAs and next with the  
201 combined negative set. In both cases, the classification of the negative set against 24-nt  
202 phasiRNAs, resulted in strong scores for all four performance measurements (Table 1), again  
203 indicative that the 24-nt phasiRNAs are also compositionally distinctive. In addition, we  
204 observed an averaged AUC of 0.93 when classifying 24-nt phasiRNAs with the combined  
205 negative set (Fig. S1d). We concluded that our classification pipeline successfully classified  
206 reproductive phasiRNAs relative to other endogenous plant sRNAs with high values for ACC,  
207 SE, SP, PPV, and AUC.

208  
209 Next, we investigated the predictive sensitivity of our pipeline, asking whether it can correctly  
210 classify previously unutilized members of a larger positive set of reproductive phasiRNAs. In  
211 other words, these new sequences were different from the 2000 used in the positive set during  
212 cross validation study. The classifier was given, first, 27500 21-nt phasiRNA sequences and,  
213 next, 7750 24-nt phasiRNA sequences (rice and maize combined, in each case). The  
214 classification pipeline based on models that combined each of the negative sets (miRNAs + P4-



215 siRNAs + tRNAs + rRNAs) predicted 26208 21-nt phasiRNAs ( $SE > 0.96$ ) and 7093 24-nt  
216 phasiRNAs ( $SE > 0.90$ ), achieving high sensitivity in the two genomes from which we  
217 developed the models (Table 2a).

218  
219 As additional test, we aimed to test the trained model in a different genome. To do so, we  
220 generated new small RNA data from panicles of the model grass *Setaria viridis* (see Method S3  
221 and Table S1). We then applied the aforementioned classification models developed from rice  
222 and maize to assess reproductive phasiRNAs in these *S. viridis* data, to evaluate the potential of  
223 this approach across species. In *S. viridis*, a dataset and genome that we had not previously  
224 analyzed, the models predicted 1868 21-nt phasiRNAs and 1723 24-nt phasiRNAs with a  
225 sensitivity ( $SE$ ) of  $> 0.93$  and  $> 0.86$ , respectively (Table 2b). We concluded that the machine-  
226 learning method is effective for *de novo* classification of plant small RNAs.

227  
228 ***Position-specific biases in phasiRNAs relative to other small RNAs***

229 Next, knowing that reproductive phasiRNAs are distinct from other classes of small RNAs, we  
230 sought to characterize these differences in greater detail, at the single nucleotide level. We  
231 computed single-nucleotide sequence profiles for the most abundant 1000 reproductive  
232 phasiRNAs (for 21-nt or 24-nt, rice and maize data combined), miRNAs, and 24-nt P4-siRNAs,  
233 determining the frequencies of each nucleotide (A, C, G, and U) at each position (Fig. 2). We  
234 then compared the position-specific base usage between the reproductive phasiRNAs and either  
235 miRNAs or 24-P4-sRNAs by conducting a two-tailed, rank sum test ( $P = 1e^{-5}$ ) to identify  
236 positions with statistically significant base usage that would distinguish phasiRNAs from either  
237 miRNAs or P4-siRNAs (Fig. 2).

238  
239 At a significance level of  $10^{-5}$ , comparing the 21-nt phasiRNAs and miRNAs, we found that the  
240 usage of bases at eight positions differed significantly (positions 1, 2, 8, 19, and 21; Fig. 2a).  
241 Next, we repeated the calculation, comparing 21-nt reproductive phasiRNAs and 24-nt P4-  
242 siRNAs (Fig. 2b), demonstrating significant differences at positions 1, 14, 19, 20, and 21.  
243 Combining these results, we made several observations: (i) in these abundant 21-phasiRNAs,  
244 there was a 5' nucleotide preference for C, consistent with a recent report (Komiya et al., 2014),  
245 but a strong depletion of G. (ii) We noticed a peak of U at the 14th position in the phasiRNAs

246 (relative to P4-siRNAs), unusual as there were no other biased positions between 3 and 19; the  
247 only other internal position showing bias was a G at position 8 in the miRNAs (Fig. 2a). (iii) In  
248 the 3' end of the 21-nt phasiRNAs, we observed a peak of G at the 19th position (with a  
249 depletion of A), and U at the 21<sup>st</sup> position (G strongly disfavored). This representation of G at the  
250 19<sup>th</sup> position was investigated in more detail below.

251  
252 We conducted a similar analysis comparing the position-specific base usage between the 24-nt  
253 reproductive phasiRNAs and P4-siRNAs. We found that positions 1, 10, 20, 21, 22, and 23 were  
254 statistically different (Fig. 2c); in other words, the 24-nt phasiRNAs and P4-siRNAs differed  
255 substantially in their base usage over the full length of the molecules. All of the over-  
256 represented nucleotides in 24-nt phasiRNAs were either A or U (Fig. 2c); the 5'- and 3' -ends  
257 showed differences in the two classes of molecules, and internal positions 10 and 11 were  
258 overrepresented for U in the 24-phasiRNAs. These correspond to the same two internal positions  
259 critical for directing cleavage by AGO proteins in the case of miRNAs (Carrington & Ambros,  
260 2003), so we noted this for subsequent phasiRNA target analysis (see below). The 3'-end  
261 difference was most striking - in the P4-siRNAs, there was a high frequency of G from the 20<sup>th</sup>  
262 to 24<sup>th</sup> positions and a coincident depletion of U (Fig. 2c), whereas 24-nt phasiRNAs had an  
263 overrepresented A at the 22<sup>nd</sup> position and U at the 3' end. Therefore, we identified several  
264 notable sequence-based features of both classes of reproductive phasiRNAs, observed at both the  
265 5'- and 3'-ends and a small number of internal positions; the 24-nt phasiRNAs also displayed an  
266 overall nucleotide composition distinct from that of P4-siRNAs. These differences likely have  
267 implications for AGO loading and phasiRNA-target interactions, while also potentially  
268 explaining the non-stoichiometric abundances of individual phasiRNAs at each *PHAS* locus.

269  
270 As observed for animal miRNAs (Chatterjee *et al.*, 2011; Tamim *et al.*, 2018), it's possible that  
271 the non-stoichiometric abundances at a *PHAS* locus results from AGO loading and subsequent  
272 stabilization of functional siRNAs. We next computed the sequence profile of 'present' or  
273 'absent' reproductive phasiRNAs in rice and maize; in other words, at a given *PHAS* locus, some  
274 phasiRNAs are never observed in the sequenced sRNAs, but we could extract these  
275 computationally and assess their sequence composition biases relative to those we detected  
276 experimentally. In a comparison to those phasiRNAs detected in the sequencing data, we

277 observed a substantial, overall sequence composition difference for 21-nt phasiRNAs (Fig. 2 a,c  
278 versus Fig. S2a, left). The differences for present versus absent 24-nt phasiRNAs were less  
279 pronounced and mainly towards the 3'-end (Fig. 2c, left, versus Fig. S2a, right). To ensure that  
280 the profiles for detected phasiRNAs were not unduly biased by the selected use of only the top  
281 1000 sequences, we also plotted sequence profile of all sequenced 21-nt phasiRNAs (Fig. S2b,  
282 left) and the 24-nt phasiRNAs (Fig. S2b, right) from the positive set (see Method S2). We  
283 observed no noticeable changes in the sequence profile relative to the abundance-selected subset  
284 (i.e. Fig. 2 a,c), except a slightly higher representation of 5'U compared to 5'C in the 21-nt  
285 phasiRNAs. The comparison of present versus absent reproductive phasiRNAs demonstrated  
286 significant differences in nucleotide composition, consistent with relative stabilization of those  
287 detected reproductive phasiRNAs after biogenesis; this may reflect AGO loading, target  
288 interactions, or other sequence-specific functions of these phasiRNAs.

289

### 290 ***The duplex nature of phasiRNA biogenesis impacts nucleotide composition***

291 The observed nucleotide biases at the 19<sup>th</sup> position in the 21-nt phasiRNAs and at the 22<sup>nd</sup>  
292 position in the 24-nt phasiRNAs were the next subject of our investigation. Dicer cleavage of  
293 dsRNA typically yields a 2-nt 3' overhang (Macrae *et al.*, 2006), and thus derived from a long,  
294 dsRNA precursor, each sRNA duplex overlaps by two complementary nucleotides at each end,  
295 with the neighboring phasiRNAs. In a schematic integrating position-specific biases (Fig. 3a,b),  
296 the influence of the most-frequent nucleotides in the “top” strand (the strand generated by RNA  
297 polymerase II, which is also targeted by the miRNA trigger) on the composition of the “bottom”  
298 strand (the strand generated by RNA DEPENDENT RNA POLYMERASE 6, RDR6) is  
299 highlighted for the first and last three nucleotide positions; for example, the 19<sup>th</sup> position G  
300 corresponds to a 5' C (1<sup>st</sup> position) for the duplex phasiRNA. Thus, there is a potential co-bias  
301 between the 1<sup>st</sup> and 19<sup>th</sup> positions, such that if both strands of a 21-nt phasiRNA duplex require a  
302 specific 5' nucleotide to ensure proper AGO loading (like a 5' C), the 19<sup>th</sup> position will co-vary  
303 with the 1<sup>st</sup> position. Alternatively, if only one strand of the duplex is loaded (due to a requisite  
304 5' nucleotide, the primary biogenesis strand, or other reasons) and the duplex partner is  
305 dispensable, then the 19<sup>th</sup> position of the loaded strand is under no selective constraints. For  
306 example, in 21-nt phasiRNAs, the 5' position was predominantly C (40.1%) at the 1<sup>st</sup> position,  
307 and the most prevalent 19<sup>th</sup> nucleotide was G (35.7%) (Fig. 4a, upper chart). This is consistent

308 with a co-bias for the paired positions in the duplex, yielding duplexes with 5' C at each end  
309 (Fig. 3a). We can infer that 21-nt phasiRNAs may have no strand specificity and either strand is  
310 likely to be loaded into the AGO protein as long as there is a 5' C. Similarly, among the 21-nt  
311 phasiRNAs, the 19A and to a lesser extent 19U classes were underrepresented (Fig. 4a, lower),  
312 corresponding to bottom-strand 1U and 1A phasiRNAs in a duplex; since 1U phasiRNAs were  
313 common among the sequenced phasiRNAs (Fig. 4a, upper), we could infer a bias against 1U  
314 phasiRNAs in the complement to phasiRNAs abundant in our libraries.

315  
316 To assess positional covariance, we analyzed 21- and 24-nt phasiRNAs versus P4-siRNAs,  
317 comparing the 5' nucleotide to the position complementary to the bottom-strand 5' position (19  
318 in 21-nt siRNAs, and 22 in 24-nt siRNAs). We used these results to make inferences (see the  
319 discussion section) about strand specificity in the biogenesis of plant reproductive phasiRNAs.  
320 First, we compared the nucleotide composition at the 19<sup>th</sup> position of 21-nt phasiRNAs for a  
321 given 1<sup>st</sup> nucleotide and we performed the same analysis for the 1<sup>st</sup> position composition with the  
322 19<sup>th</sup> position fixed (Fig. 4b). The 1U phasiRNAs (i.e. 5' U) had an almost uniform distribution  
323 of nucleotides at the 19<sup>th</sup> position, which was striking relative to the 1C, 1A, and 1G phasiRNAs,  
324 which were depleted for 19A phasiRNAs (and 19U, to a lesser extent). Another noticeable bias  
325 was for 1C phasiRNAs, which were predominantly 19C or 19G, yielding a phasiRNA duplex of  
326 either 1C/1G or 1C/1C (top strand/bottom strand). 19G was prevalent for 1A, 1U, and 1G  
327 phasiRNAs, which in each case would yield a 1C bottom-strand phasiRNA. Next, we analyzed  
328 the 5' nucleotide composition for 21-nt phasiRNAs after fixing the 19<sup>th</sup> position (Fig. 4b, lower  
329 panel). Among 19G phasiRNAs (the predominant group based on Fig. 4a), 1C was most  
330 common, corresponding to a 1C/1C duplex. For 19C phasiRNAs (1G on the complement), a  
331 strong bias of 1C was observed; since 1C 21-nt phasiRNAs are most commonly loaded to MEL1  
332 (Komiya *et al.*, 2014), this was perhaps an indication of strand specificity (i.e. 1C/1G duplexes,  
333 so only the 1C strand loaded). Therefore, among 21-nt phasiRNAs, there is a co-bias of the 1<sup>st</sup>  
334 and 19<sup>th</sup> positions, perhaps reflective of strand specificity in AGO loading.

335  
336 Next, we performed similar analyses for 24-nt phasiRNAs, focused on the 1<sup>st</sup> and 22<sup>nd</sup> positions  
337 (Fig. 3b). The 1<sup>st</sup> position was less biased than 21-nt phasiRNAs, although 1G was also  
338 underrepresented (Fig. 4c, upper); at the 22<sup>nd</sup> position, there was less bias than for the 19<sup>th</sup>

339 position of the 21-mers (Fig. 4c, lower), with an increase of A representation, particularly  
340 relative to other nucleotide positions (Fig. 2c, left). 22A corresponds to 1U in the complement,  
341 and since 1U 24-nt phasiRNAs were common in our dataset (Fig. 4c, upper), both phasiRNAs in  
342 such a duplex are favored in our data, consistent with a lack of strand specificity. Lower levels of  
343 1<sup>st</sup>/22<sup>nd</sup> position covariation were observed in 24-nt than 21-nt phasiRNAs (Fig. 4d), and there  
344 was an overall A-U enrichment (Fig. 2c), demonstrating more relaxed sequence constraints.

345  
346 For comparison to the 24-nt phasiRNAs, we measured the position-specific nucleotide biases for  
347 P4-siRNAs. Their precursors have been described (Fig. 3d; summarized from Blevins *et al.*,  
348 2015; Zhai *et al.*, 2015a), although the nature of RDR2-derived bottom strands is as-yet  
349 incompletely understood (i.e. how they initiate and terminate relative to the ends of the P4  
350 precursor). Unlike phasiRNAs, however, there is no expectation of P4-siRNA “duplexes”  
351 whereby either strand could be loaded, and data from Zhai *et al.* (2015a) indicate that the P4  
352 strand is preferably loaded over the RDR2 strand (Fig. 3c). Apart from the strong overall 1A bias  
353 mentioned above, no notable co-variation biases were observed (Fig. 4e,f); i.e. the proportional  
354 representation in the 22<sup>nd</sup> position was essentially invariant, regardless of the 1<sup>st</sup> position  
355 nucleotide, G>C>A>U, consistent with a strong overall bias to the GGGGC motif in the 3’ end  
356 (Fig. 2c).

357  
358 Combining the compositional analyses described above, we applied these same approaches to an  
359 unusual group of siRNAs, a set of 22-nt, putative heterochromatic siRNAs that are RDR2-  
360 independent, thus far found only in maize (Nobuta *et al.*, 2008). We were interested to analyze  
361 these “22-nt hc-siRNAs” because they are poorly characterized and their relationship to P4-  
362 siRNAs is not known (see Method S4 for extracting 22-nt siRNAs). The most significant  
363 difference between 22-nt hc-siRNAs and 24-nt P4-siRNAs was at 5’ end positions 1, 3 and 4  
364 (Fig. S3 a,b), but the level of A in 22-nt hc-siRNAs was significantly lower from position 12 to  
365 the 3’ end, compared to the 24-nt P4-siRNAs. There were apparent 3’ differences as well, but  
366 this was from the comparison performed by counting nucleotides from the 5’ end. We reassessed  
367 differences by aligning the 3’ ends and measuring positions starting from the 3’ end (i.e.  
368 comparing up to five positions at the 3’ end minus N nucleotides), in case AGO binding occurs  
369 in some cases from the 3’ end. Measured this way, we observed only one 3’ difference, at the 3’

370 end – 1 position, at which the G-U composition varied significantly (Fig. S3c). We next looked  
371 at covariation between the 20<sup>th</sup> and 1<sup>st</sup> nucleotides in the 22-nt hc-siRNAs; as with P4-siRNAs,  
372 the 20<sup>th</sup> nucleotide representation was more or less the same for all 5' nucleotides, and even for  
373 the major class of 5' U siRNAs, 20<sup>th</sup> position G or C nucleotides were equally represented (Fig.  
374 S3d). This lack of bias would yield many bottom strand 5' G sRNAs which are disfavored,  
375 consistent with strand specificity for the 22-nt hc-siRNAs (Fig. S3e). Thus, these RDR2-  
376 independent 22-nt siRNAs may be produced by the activity of other RDRs such as RDR1 or  
377 RDR6; although the RNA polymerase generating their primary strand precursor remains to be  
378 determined, the 5' difference of 22-nt hc-siRNAs compared to P4-siRNAs suggests an  
379 alternative production pathway and/or function.

380  
381 The results of analysis of the nucleotide and co-variation biases across different classes of  
382 siRNAs at the 5' and 3'-proximal ends are consistent with evidence of strand specificity for both  
383 21- and 24-nt phasiRNA duplexes. There is stronger support for strand selection of 21-nt  
384 reproductive phasiRNAs, perhaps reflective of selection by the AGO protein of one strand over  
385 the other.

386

### 387 ***Predicted targets of reproductive phasiRNAs as a means to infer function***

388 As little is known about the targets and the functions of the reproductive phasiRNAs, we  
389 attempted to predict targets for the 500 most abundant pre-meiotic (21-nt) and meiotic (24-nt)  
390 phasiRNAs in rice. Using standard criteria (i.e. modeled on known miRNA-target interactions),  
391 prior reports have failed to find targets of reproductive phasiRNAs, while reporting few details  
392 of these analyses due to the negative result (Song *et al.*, 2012b; Zhai *et al.*, 2015b). We revisited  
393 this topic because new, more powerful, faster and flexible target prediction methods are  
394 available; prior work used a “seed-based” sRNA-target interaction pipeline, which is derived  
395 from models of animal miRNAs and does not accurately capture the target similarity of most  
396 plant miRNAs (Kakrana *et al.*, 2014). We used sPARTA (Kakrana *et al.*, 2014) based on a  
397 “seed-free” approach and allows greater flexibility in pairing parameters. To gain insights about  
398 phasiRNA targeting, we conducted a comparative analysis, measuring class-by-class how  
399 predicted targets of these abundant phasiRNAs compared to those of other known sRNAs, such  
400 as miRNAs and P4-siRNAs.

401

## 402 21-nt phasiRNAs

403 First, we compared in rice the distribution of predicted target scores (TS) of 21-nt phasiRNAs  
404 with a selected set of known, conserved miRNAs (Fig. 5a). We selected plant miRNAs with  
405 numbers lower than miR1000 (i.e. osa-miR162) (n=288), as these are generally abundant,  
406 conserved, and better characterized than any more recently-described miRNAs. For each class,  
407 miRNAs versus 21-nt phasiRNAs, targets were predicted using sPARTA (Kakrana *et al.*, 2014).  
408 We retained two sets of results, either all targets or only the “best” targets (those with a lowest  
409 target penalty score, meaning a high degree of complementarity). Each sRNA would also have at  
410 least one perfect match in the genome, a target score of 0, potentially the result of targeting in  
411 *cis*. For 21-nt phasiRNAs, the TS distribution showed a peak in the number of best targets at 3.5  
412 (Fig. 5a, left), compared to ~1 for miRNAs (Fig. 5a, right). The relative paucity of TS matches in  
413 the range of 0.5 to 1.5 for 21-nt phasiRNAs was striking, particularly since many miRNAs have  
414 predicted targets in this range. We inferred based on this pattern of sequence complementarity  
415 that 21-nt phasiRNAs, unlike miRNAs, either may function largely in *cis* via perfect matches or  
416 have been selected to avoid closely-matched targets.

417

418 To dissect these predicted sRNA-target interactions in rice, we recorded position-specific  
419 matches for both 21-nt phasiRNA-target interactions and 21-nt miRNA-target interactions (Fig.  
420 5b). This represented the putative binding pattern as a percentage of each position of predicted  
421 matches, gaps, wobbles, and mismatches. We selected only predicted targets (for both  
422 phasiRNAs and miRNAs) with a TS between 0.5 and 3.5, omitting self-targeting interactions.  
423 Overall, consistent with higher scores, 21-nt phasiRNAs showed lower match rates across all  
424 positions than miRNAs (Fig. 5b); a few substantial position-specific differences were observed,  
425 including higher match rates for phasiRNAs at the 1<sup>st</sup> and 21<sup>st</sup> positions, and a higher (yet  
426 unexplainable) rate of gaps at the 15<sup>th</sup> position (Fig. 5b). We concluded that unless 21-nt  
427 reproductive phasiRNAs target primarily in *cis*, they must have lower levels of complementarity  
428 to their targets than miRNAs.

429

## 430 24-nt phasiRNAs

431 Next, we extended our analysis to attempt to find the targets of the reproductive 24-nt  
432 phasiRNAs, again focusing on rice. We performed similar analyses as above and compared the  
433 TS distribution of 24-nt phasiRNAs (Fig. 5c, left) with the top 500 most abundant 24-nt P4-  
434 siRNAs (Fig. 5c, right). For the 24-mers, we omitted the higher penalty for a mismatch at the  
435 10<sup>th</sup> and 11<sup>th</sup> positions in the target alignment; that penalty is relevant for 21/22-nt sRNAs that  
436 direct cleavage at those positions, whereas pairing requirements for individual 24-nt siRNAs  
437 have not been described or tested. For the 24-nt phasiRNAs, we observed a peak in the number  
438 of best targets at 4.5 (Fig. 5c, left); while score of 4.5 to 5 was also the peak for P4-siRNAs  
439 (excluding perfect, or ‘cis’ matches at 0), P4-siRNAs had a much more even distribution of  
440 scores. There was a striking gap in the distribution of target scores from 0 to ~2 for the 24-nt  
441 phasiRNAs, indicating that these lack highly homologous *trans* targets (Fig. 5c, left). In other  
442 words, the 24-nt phasiRNAs are largely quite distinct from most other genome sequences,  
443 relative to P4-siRNAs, which find many highly homologous potential target sites.

444  
445 Again, as for the 21-nt phasiRNAs, we predicted and recorded position-specific matches for both  
446 24-nt phasiRNA-target interactions and P4-siRNA-target interactions (Fig. 5d). This represented  
447 the putative binding pattern as a percentage of each position of predicted matches, gaps,  
448 wobbles, and mismatches. In this case, given the different score distribution relative to 21-mers,  
449 we selected only predicted targets (for both phasiRNAs and P4-siRNAs) with a TS between 0.5  
450 and 5, omitting self-targeting interactions. Overall, consistent with higher TS scores, 24-nt  
451 phasiRNAs showed much lower match rates across all positions than P4-siRNAs (Fig. 5d left  
452 versus right), i.e. an average of 15 to 20% mismatches compared to fewer than 15% mismatches  
453 for 24-nt P4-siRNAs.

#### 454 455 Classes of predicted reproductive phasiRNA targets

456 As a final step in analyzing the possible targets of reproductive phasiRNAs in rice, we classified  
457 the predicted target loci. This analysis used all predicted targets described in the sections above,  
458 including both *cis* and *trans* targets. In rice, the top 500 21-nt phasiRNAs were predicted to  
459 target 7766 loci (Table S2). These putative targets included 1400 (18.02 percent) loci classified  
460 by RepeatMasker as related to the transposable elements (TEs). The top 500 24-nt phasiRNAs  
461 were predicted to target 5631 loci, of which 836 (14.84 percent) are related to TEs (Table S3).



462 To assess whether these predicted matches to TEs represent an enrichment or depletion  
463 compared to random chance, we randomly selected 7800 and 5600 genes from the 35,000+  
464 annotated genes in rice; among these, ~30 to 31% are TE-like. Therefore, the predicted targets of  
465 reproductive phasiRNAs are relatively depleted for TE-like targets. Overall, our more detailed  
466 results are consistent with earlier statements that classes of potential targets are not evident for  
467 reproductive phasiRNAs, and thus the characterization of their functions will require molecular  
468 and biochemical investigation.

469

## 470 **Discussion**

471 Our machine learning-based workflow focused on sequenced-based and structural features of  
472 plant sRNAs, with an emphasis on the poorly characterized set of reproductive phasiRNAs. We  
473 demonstrate that this approach can successfully classify reproductive phasiRNAs relative to  
474 other endogenous plant sRNAs, with high values for ACC, SE, SP, PPV, and AUC. Feature  
475 selection demonstrated the importance of the 5'- and 3'- ends, k-mer features, GC content, and  
476 structural features including the MFE. We observed characteristics that may reflect specificity in  
477 AGO loading of reproductive phasiRNAs, the key to the function of all sRNAs. Examination of  
478 spatiotemporal expression data for AGOs in rice and maize shows a high correlation between  
479 peaks of abundance of reproductive phasiRNAs and *AGO* genes, suggesting that there might be a  
480 functional connection. From rice and maize data, this includes OsAGO1d, ZmAGO18b,  
481 OsAGO18, OsAGO2b (Zhai *et al.*, 2015b; Fei *et al.*, 2016), and OsAGO5c (MEL1) which loads  
482 21-nt phasiRNAs in rice. In Arabidopsis, AGO3, close to OsAGO2b (Zhang *et al.*, 2015),  
483 recruits 24-nt sRNAs with 5'A and effects epigenetic silencing, consistent with the hypothesis  
484 that 5'A 24-nt phasiRNAs might be loaded into AGO2b in grasses. Moreover, ZmAGO18b, a  
485 grass specific AGO, binds both 21-nt phasiRNAs with 5'U and 24-nt phasiRNAs with 5'A to  
486 function in inflorescence meristem and tassel development (Sun *et al.*, 2017). Our classification  
487 data lay the groundwork for better definition of AGO-phasiRNA interactions.

488

489 One unique aspect of working with the reproductive phasiRNAs is that their production from  
490 long, double-stranded RNA precursors from hundreds or thousands of loci yields a rich dataset  
491 for which comparable analyses of tasiRNAs or miRNAs are not possible due to their more  
492 limited representation. This allowed the large-scale assessment of biases in representation in the

493 libraries, from which we observed significant biases in the representation of specific nucleotides  
494 at the 1<sup>st</sup> and 19<sup>th</sup> positions among the 21-mers. One possible interpretation of these biases is a  
495 model of competition for loading between the two strands of a duplex, whereby one strand is  
496 preferentially loaded over the other, typically understood to be driven by the 5' nucleotide  
497 (Schwarz *et al.*, 2003), which is a preferred C in the case of 21-nt reproductive phasiRNAs  
498 (Komiya *et al.*, 2014). Yet, 1U phasiRNAs are quite abundant, begging the question of whether  
499 these are competing with 1C phasiRNAs for loading into MEL1; among sequenced MEL1-  
500 associated phasiRNAs, 1U phasiRNAs were less than 10% of the total (Komiya *et al.*, 2014).  
501 Perhaps the higher proportion in the sequenced phasiRNAs reflects (1) stability in the absence of  
502 loading, or (2) perhaps 1U phasiRNAs are loaded into a different AGO than the 1C phasiRNAs –  
503 maybe AGO1, known to have an affinity for 1U 21-nt sRNAs (Zhao *et al.*, 2016). Assuming the  
504 latter, for the sake of argument, the difference in the 19<sup>th</sup> position for a given 1<sup>st</sup> position  
505 nucleotide for the 21-nt reproductive phasiRNAs could be explained by AGO affinity: 1U  
506 phasiRNAs may be loaded as well or better than 1C phasiRNAs, but into this different AGO. An  
507 additional influence on these terminal or near-terminal positions may be strand selection during  
508 AGO loading of the duplex, which is influenced by factors including the thermodynamic stability  
509 of the two ends of each phasiRNA duplex (Schwarz *et al.*, 2003).

510  
511 Based on the observation of abundant 1U and 1C 21-nt phasiRNAs, we hypothesized an AGO  
512 competition model (Fig. S4). We inferred/hypothesized this because of the data in Fig. 4B (upper  
513 panel) that the sequenced 1V (V = A or C or G, using the IUPAC code) phasiRNAs are depleted  
514 for 19A phasiRNAs, which would be 1U on the bottom strand; perhaps this is because in a  
515 duplex with a 1U phasiRNA, the 1U phasiRNA is loaded. But sequenced 1U phasiRNAs showed  
516 no bias in the 19<sup>th</sup> position, because they are preferred over the opposite strand, and thus are the  
517 “winners” in the competition (Fig. S4a). In contrast, the 1R/19G (R = A or G) phasiRNAs are  
518 paired with 1C phasiRNAs, which is AGO loaded (Fig. S4b). The 1V/19C phasiRNAs are  
519 abundant because these are paired with 1G phasiRNAs, which are not AGO loaded and thus are  
520 always “losers” in the competition with their duplex pairs. The 1C phasiRNAs are an interesting  
521 case because based on frequency,  $1C/19C > 1C/19G > 1C/19W$  (W = A or U) (Fig. 4b, upper  
522 panel). The 1C/19G phasiRNAs are paired with 1C phasiRNAs, which compete well, and thus  
523 either strand may be loaded and stabilized (Fig. S4c). The 1C/19U phasiRNAs are less frequent

524 because they are paired with 1A phasiRNAs that are not particularly stabilized or loaded. In  
525 other cases (Fig. S4d), the frequency of 1D/19G phasiRNA is higher than 1D/19C (D = A or G  
526 or U) (Fig. 4b, upper panel); one interpretation of the high frequency of 1D/19G is that since the  
527 1D/19G phasiRNAs are paired with a 1C/19H phasiRNA (H = A or C or T), thus 1C/19H  
528 phasiRNA is preferentially loaded and stabilized. Thus, phasiRNAs from a 1D/19G duplex are  
529 more abundant than those from a 1D/19C duplex because in the latter, the 1G/19H phasiRNA on  
530 the bottom strand is likely not loaded or stabilized. With as rich a dataset as reproductive  
531 phasiRNAs provide, we can start to resolve the sequence-based characteristics that influence  
532 representation in sequencing data, and infer the mechanistic basis for these differences. For  
533 example, we identified novel position-specific biases, like the 14<sup>th</sup> position in the 21-nt  
534 phasiRNAs (Fig. 2a, left, and Fig. S2b, left). These internal positions may be important for AGO  
535 loading, or phasing function/targeting, and thus future functional or structural studies should  
536 investigate these in greater detail.

537

### 538 **Acknowledgments**

539 We are grateful to members of the Meyers lab for useful discussions. We also acknowledge the  
540 contribution of maize *mop1 (rdr2)* mutant tissue from the lab of Vicki Chandler, and Stacey  
541 Simon for the construction of those libraries.

542

### 543 **Funding**

544 This research was supported by NSF IOS Plant Genome Research program award #1339229 (to  
545 B.C.M.), and a University of Delaware Graduate Fellow Award (to P.P.).

546

### 547 **Author Contributions**

548 Experiments were designed by P.P., H.S., S.M., and B.C.M. P.P. implemented methods and  
549 conducted the analyses. A.K. contributed methods and algorithmic refinements. H.S. contributed  
550 conceptual ideas. S.M. performed data generation. P.P. and B.C.M. wrote the paper with input  
551 from all authors; all authors read and approved the manuscript.

552 **References**

553

554 **Axtell MJ. 2013.** Classification and comparison of small RNAs from plants. *Annual Review of*  
555 *Plant Biology* **64**: 137–59.

556 **Blevins T, Podicheti R, Mishra V, Marasco M, Wang J, Rusch D, Tang H, Pikaard CS.**  
557 **2015.** Identification of pol IV and RDR2-dependent precursors of 24 nt siRNAs guiding de novo  
558 DNA methylation in arabidopsis. *eLife* **4**.

559 **Borges F, Martienssen RA. 2015.** The expanding world of small RNAs in plants. *Nature*  
560 *Reviews Molecular Cell Biology* **16**: 727–741.

561 **Brayet J, Zehraoui F, Jeanson-Leh L, Israeli D, Tahi F. 2014.** Towards a piRNA prediction  
562 using multiple kernel fusion and support vector machine. *Bioinformatics (Oxford, England)* **30**:  
563 i364-70.

564 **Breiman L. 2001.** Random forests. *Machine Learning* **45**: 5–32.

565 **Carrington JC, Ambros V. 2003.** Role of microRNAs in plant and animal development.  
566 *Science* **301**: 336–338.

567 **Chatterjee S, Fasler M, Büssing I, Großhans H. 2011.** Target-Mediated Protection of  
568 Endogenous MicroRNAs in *C. elegans*. *Developmental Cell* **20**: 388–396.

569 **Fei Q, Yang L, Liang W, Zhang D, Meyers BC. 2016.** Dynamic changes of small RNAs in  
570 rice spikelet development reveal specialized reproductive phasiRNA pathways. *Journal of*  
571 *Experimental Botany* **67**: 6037–6049.

572 **Frank E, Hall MA, Witten IH. 2016.** *The WEKA Workbench*. Burlington,USA: Morgan  
573 Kaufmann

574 **Guttman M, Rinn JL. 2012.** Modular regulatory principles of large non-coding RNAs. *Nature*  
575 **482**: 339–346.

576 **Johnson C, Kasprzewska A, Tennessen K, Fernandes J, Nan GL, Walbot V, Sundaresan V,**  
577 **Vance V, Bowman LH. 2009.** Clusters and superclusters of phased small RNAs in the  
578 developing inflorescence of rice. *Genome Research* **19**: 1429–1440.

579 **Kakrana A, Hammond R, Patel P, Nakano M, Meyers BC. 2014.** sPARTA: a parallelized  
580 pipeline for integrated analysis of plant miRNA and cleaved mRNA data sets, including new  
581 miRNA target-identification software. *Nucleic acids research* **42**: e139.

582 **Kohavi R. 1995.** A Study of Cross-Validation and Bootstrap for Accuracy Estimation and

- 583 Model Selection. In: Appears in the International Joint Conference on Artificial Intelligence  
584 (IJCAI). 1–7.
- 585 **Komiya R, Ohyanagi H, Niihama M, Watanabe T, Nakano M, Kurata N, Nonomura K-I.**  
586 **2014.** Rice germline-specific Argonaute MEL1 protein binds to phasiRNAs generated from more  
587 than 700 lincRNAs. *Plant Journal* **78**: 385–397.
- 588 **Kung JTY, Colognori D, Lee JT.** **2013.** Long Noncoding RNAs: Past, Present, and Future.  
589 *Genetics* **193**: 651–669.
- 590 **Lertampaiporn S, Thammarongtham C, Nukoolkit C, Kaewkamnerdpong B,**  
591 **Ruengjitchatchawalya M.** **2014.** Identification of non-coding RNAs with a new composite  
592 feature in the Hybrid Random Forest Ensemble algorithm. *Nucleic Acids Research* **42**: e93.
- 593 **Macrae IJ, Zhou K, Li F, Repic A, Brooks AN, Cande WZ, Adams PD, Doudna JA.** **2006.**  
594 Structural basis for double-stranded RNA processing by Dicer. *Science (New York, N.Y.)* **311**:  
595 195–8.
- 596 **Matzke MA, Mosher RA.** **2014.** RNA-directed DNA methylation: an epigenetic pathway of  
597 increasing complexity. *Nature Reviews Genetics* **15**: 394–408.
- 598 **Meister G.** **2013.** Argonaute proteins: functional insights and emerging roles. *Nature reviews.*  
599 *Genetics* **14**: 447–59.
- 600 **Nobuta K, Lu C, Shrivastava R, Pillay M, De Paoli E, Accerbi M, Arteaga-Vazquez M,**  
601 **Sidorenko L, Jeong D-H, Yen Y, et al.** **2008.** Distinct size distribution of endogenous siRNAs  
602 in maize: Evidence from deep sequencing in the mop1-1 mutant. *Proceedings of the National*  
603 *Academy of Sciences, USA* **105**: 14958–14963.
- 604 **Nonomura K-I, Morohoshi A, Nakano M, Eiguchi M, Miyao A, Hirochika H, Kurata N.**  
605 **2007.** A germ cell-specific gene of the ARGONAUTE family is essential for the progression of  
606 premeiotic mitosis and meiosis during sporogenesis in rice. *Plant Cell* **19**: 2583–2594.
- 607 **Schwarz DS, Hutvagner G, Du T, Xu Z, Aronin N, Zamore PD.** **2003.** Asymmetry in the  
608 assembly of the RNAi enzyme complex. *Cell* **115**: 199–208.
- 609 **Song X, Li P, Zhai J, Zhou M, Ma L, Liu B, Jeong DH, Nakano M, Cao S, Liu C, et al.**  
610 **2012a.** Roles of DCL4 and DCL3b in rice phased small RNA biogenesis. *Plant Journal* **69**: 462–  
611 474.
- 612 **Song X, Li P, Zhai J, Zhou M, Ma L, Liu B, Jeong DH, Nakano M, Cao S, Liu C, et al.**  
613 **2012b.** Roles of DCL4 and DCL3b in rice phased small RNA biogenesis. **69**: 462–474.

- 614 **Sun W, Xiang X, Zhai L, Zhang D, Cao Z, Liu L, Zhang Z. 2017.** AGO18b negatively  
615 regulates determinacy of spikelet meristems on the tassel central spike in maize. *Journal of*  
616 *Integrative Plant Biology*.
- 617 **Tamim S, Cai Z, Mathioni S, Zhai J, Teng C, Zhang Q. 2018.** The basis of accumulation  
618 differences in plant 21-nt reproductive phasiRNAs , and their cis- directed activity. *bioRxiv*. doi:  
619 10.1101/243907
- 620 **Tisseur M, Kwapisz M, Morillon A. 2011.** Pervasive transcription - Lessons from yeast.  
621 *Biochimie* **93**: 1889–1896.
- 622 **Yang P, Hwa Yang Y, B. Zhou B, Y. Zomaya A. 2010.** A Review of Ensemble Methods in  
623 Bioinformatics. *Current Bioinformatics* **5**: 296–308.
- 624 **Zhai J, Bischof S, Wang H, Feng S, Lee T-F, Teng C, Chen X, Park SY, Liu L, Gallego-**  
625 **Bartolome J, et al. 2015a.** A One Precursor One siRNA Model for Pol IV-Dependent siRNA  
626 Biogenesis. *Cell* **163**: 445–455.
- 627 **Zhai J, Zhang H, Arikait S, Huang K, Nan G-L, Walbot V, Meyers BC. 2015b.**  
628 Spatiotemporally dynamic, cell-type-dependent premeiotic and meiotic phasiRNAs in maize  
629 anthers. *Proceedings of the National Academy of Sciences, USA* **112**: 3146–3151.
- 630 **Zhang Y, Wang X, Kang L. 2011.** A k-mer scheme to predict piRNAs and characterize locust  
631 piRNAs. *Bioinformatics* **27**: 771–776.
- 632 **Zhang H, Xia R, Meyers BC, Walbot V. 2015.** Evolution, functions, and mysteries of plant  
633 ARGONAUTE proteins. *Current Opinion in Plant Biology* **27**: 84–90.
- 634 **Zhao J-H, Fang Y-Y, Duan C-G, Fang R-X, Ding S-W, Guo H-S. 2016.** Genome-wide  
635 identification of endogenous RNA-directed DNA methylation loci associated with abundant 21-  
636 nucleotide siRNAs in Arabidopsis. *Scientific Reports* **6**: 36247.
- 637

638 **Supplemental Information**

639 The following materials are available in the online version of this article.

640

641 **Fig. S1** Information gain (IG) based feature selection

642 **Fig. S2** Sequence profiles of absent phasiRNAs and all detected phasiRNAs from *PHAS* loci

643 **Fig. S3** 22-nt siRNAs from maize are distinct from P4-siRNAs

644 **Fig. S4** An AGO competition model

645

646 **Table S1** sRNA libraries from maize, rice and *Setaria viridis* used in this study

647 **Table S2** Predicted targets of 21-nt phasiRNAs in rice

648 **Table S3** Predicted targets of 24-nt phasiRNAs in rice

649 **Table S4** Top 30 features, from example comparisons, obtained using information gain.

650

651 **Method S1** Dataset used for cross validation study

652 **Method S2** Features included in the machine learning algorithm, and their selection

653 **Method S3** Computational analysis of sequencing data

654 **Method S4** Extraction of a set of maize 22-nt hc-siRNAs

655 **Tables**

656 **Table 1.** Results of classification to distinguishing phasiRNAs of lengths 21-nt (top) and 24-nt  
657 (bottom) from other small RNA types.

| Classification |                                    | Performance Evaluation Measure |                    |                    |                    |                    |
|----------------|------------------------------------|--------------------------------|--------------------|--------------------|--------------------|--------------------|
| Positive set   | Negative set                       | ACC ( $\pm$ SD)                | SP ( $\pm$ SD)     | SE ( $\pm$ SD)     | PPV ( $\pm$ SD)    | AUC ( $\pm$ SD)    |
| 21-nt phasiRNA | miRNAs* + P4-siRNA + tRNA* + rRNA* | 0.93 ( $\pm$ 0.01)             | 0.91 ( $\pm$ 0.00) | 0.92 ( $\pm$ 0.01) | 0.93 ( $\pm$ 0.01) | 0.97 ( $\pm$ 0.00) |
|                | miRNAs* + P4-siRNA                 | 0.93 ( $\pm$ 0.01)             | 0.90 ( $\pm$ 0.00) | 0.94 ( $\pm$ 0.01) | 0.87 ( $\pm$ 0.02) | 0.97 ( $\pm$ 0.00) |
|                | P4-siRNAs, 3' trimmed              | 0.83 ( $\pm$ 0.02)             | 0.84 ( $\pm$ 0.01) | 0.83 ( $\pm$ 0.02) | 0.83 ( $\pm$ 0.01) | 0.92 ( $\pm$ 0.00) |
|                | miRNAs, 3' trimmed                 | 0.81 ( $\pm$ 0.01)             | 0.77 ( $\pm$ 0.01) | 0.85 ( $\pm$ 0.03) | 0.78 ( $\pm$ 0.02) | 0.90 ( $\pm$ 0.01) |
| 24-nt phasiRNA | P4-siRNA                           | 0.84 ( $\pm$ 0.01)             | 0.82 ( $\pm$ 0.00) | 0.84 ( $\pm$ 0.01) | 0.83 ( $\pm$ 0.01) | 0.91 ( $\pm$ 0.01) |
|                | miRNAs* + P4-siRNA + tRNA* + rRNA* | 0.87 ( $\pm$ 0.01)             | 0.82 ( $\pm$ 0.00) | 0.91 ( $\pm$ 0.01) | 0.84 ( $\pm$ 0.01) | 0.93 ( $\pm$ 0.01) |

658 Note: ACC, accuracy; SP, specificity; SE, sensitivity; PPV, positive predictive value. See  
659 methods for further detail. An asterisk (\*) next to a negative subset indicates no size selection or  
660 trimming of the sequences. Results are averaged over the five-fold cross-validation. The size of  
661 positive and negative sets are as follows: 21-nt phasiRNAs (n=2000), 24-nt phasiRNAs  
662 (n=2000), miRNA (n=756), P4-siRNAs (n=2000), tRNAs (n=500), and rRNAs (n=500).

663

664 **Table 2.** Predictive performance of classification models of 21-and 24-nt phasiRNAs.

| a. Predictive sensitivity on rice and maize                       |                                                        |                                |       |
|-------------------------------------------------------------------|--------------------------------------------------------|--------------------------------|-------|
| Predictive sensitivity                                            | Classification Model<br>(positive set vs negative set) | Performance Evaluation Measure |       |
|                                                                   |                                                        | TP                             | SE    |
| 21-nt phasiRNAs                                                   | 21-nt phasiRNA vs. miRNA + P4-siRNA + tRNA + rRNA      | 26458/27500                    | 0.962 |
| 24-nt phasiRNAs                                                   | 24-nt phasiRNA vs. miRNA + P4-siRNA + tRNA + rRNA      | 7017/7750                      | 0.905 |
| b. Cross-species predictive sensitivity in <i>Setaria viridis</i> |                                                        |                                |       |
| 21-nt phasiRNAs                                                   | 21-nt phasiRNA vs. miRNA + P4-siRNA + tRNA + rRNA      | 1868/2000                      | 0.934 |
| 24-nt phasiRNAs                                                   | 24-nt phasiRNA vs. miRNA + P4-siRNA + tRNA + rRNA      | 1723/2000                      | 0.861 |

665

666 Note: TP, true positive prediction; SE, sensitivity.

667



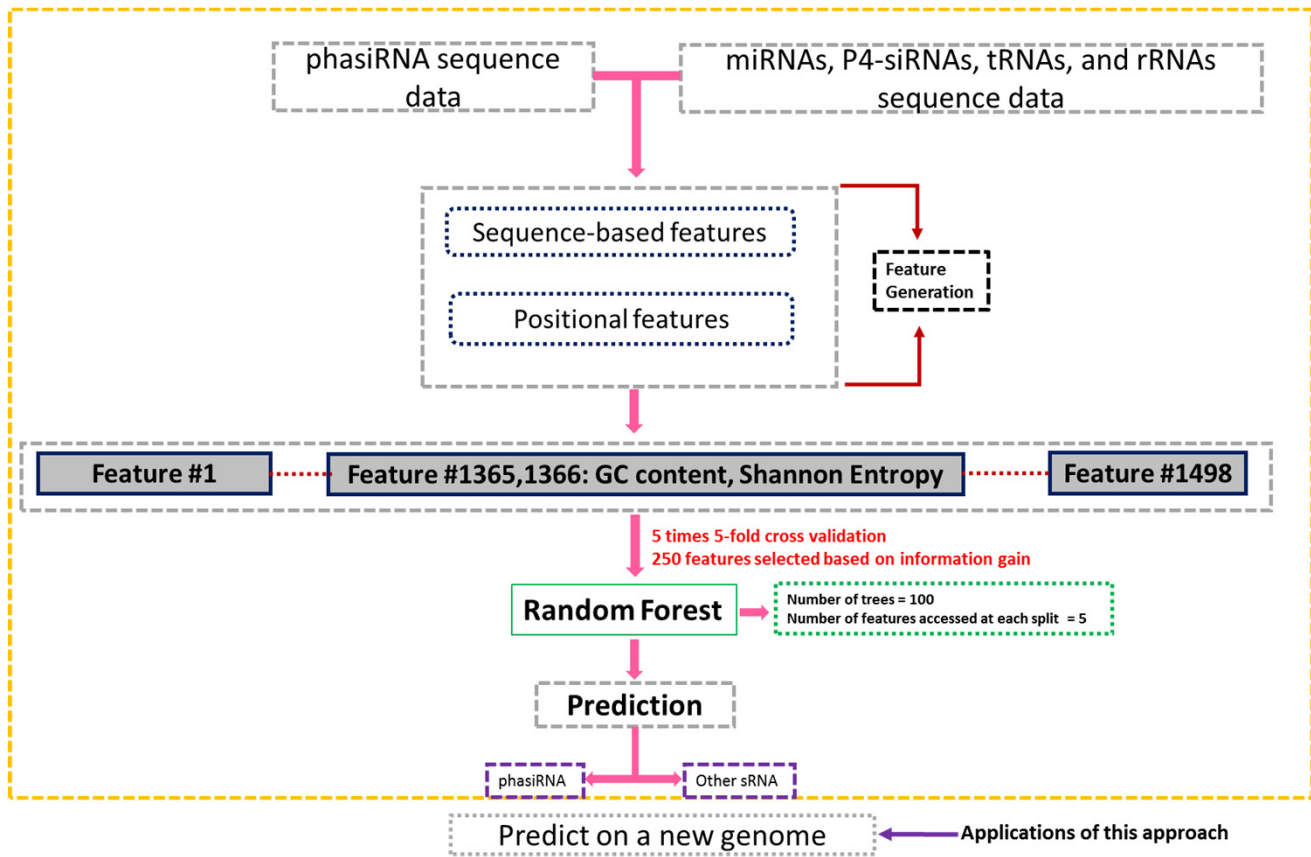

**Fig. 1** General workflow of our pipeline.

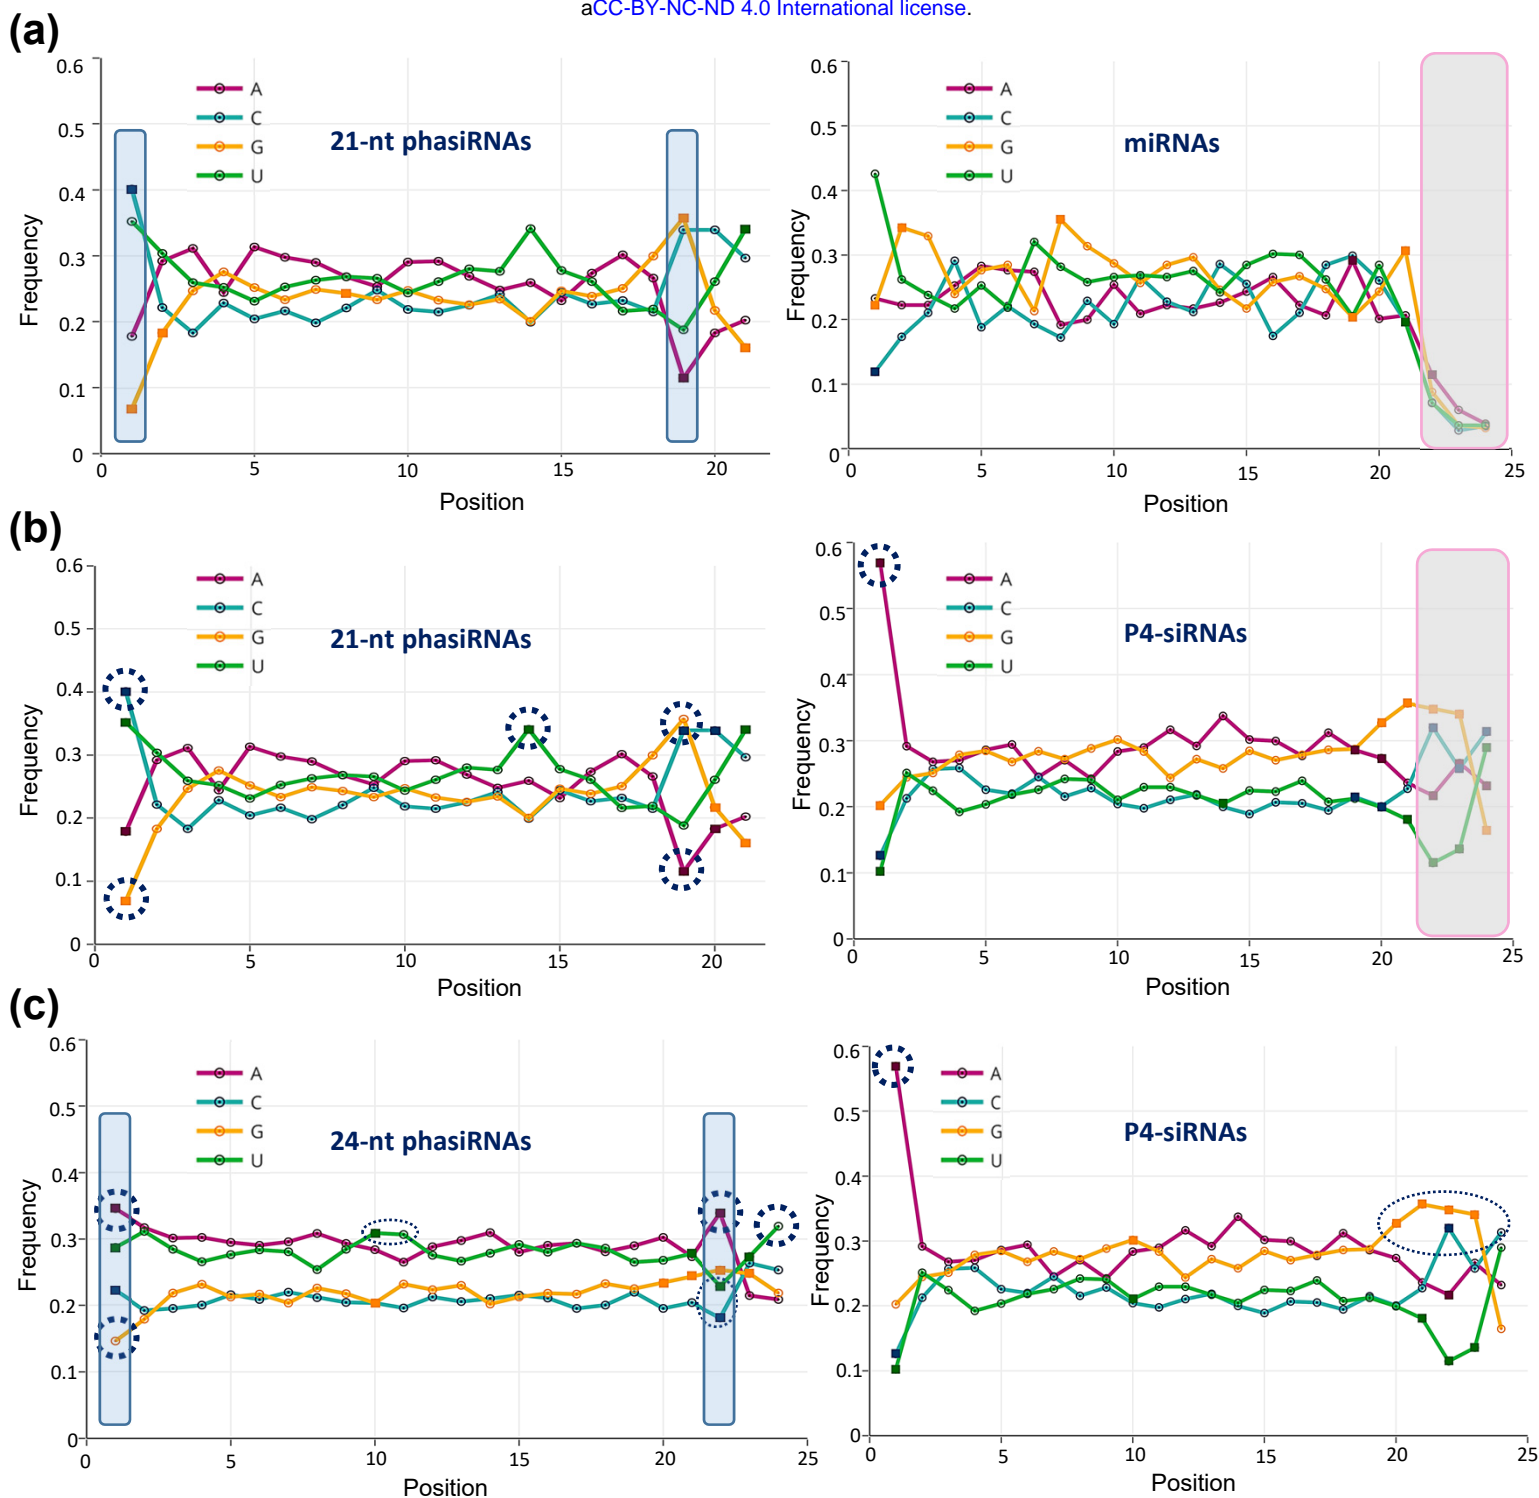

**Fig. 2 Reproductive phasiRNAs have characteristic position-specific nucleotide biases.**

Single-nucleotide sequence profiles of position specific base usage comparing 21-nt phasiRNAs (left) and either miRNAs (at right in panel (a)), or 24-nt P4-siRNAs (at right in panel (b)). For all phasiRNA analyses in this figure, the top most abundant 1000 phasiRNAs from the rice and maize data were combined; in panel (a), 553 rice and 203 maize miRBase-annotated miRNAs were used (see Method S2). The frequencies of each of the four bases (A, C, G, and U) at each position are indicated as an open circle. Markers denoted as small square boxes represent positions at which a statistically significant ( $p = 1e-5$ ) base usage distinguishes phasiRNAs and either miRNAs (panel (a)) or P4-siRNAs (panel (b)), determined by comparison of the data in the two plots. Dotted circles highlight positions in the sequences selected for further discussion in the main text. The gray boxes at right covering the 22nd, 23rd, and 24th positions to retain fair comparison with 21-nt phasiRNAs and the longer sequences, including that those additional position could be disregarded. (c) Single-nucleotide sequence profiles of position specific base usage comparing 24-nt phasiRNAs (at left) and 24-nt P4-siRNAs (at right). In panels (a,c), the blue boxes highlight positions that were analyzed in greater detail in Fig. 4 (positions #1 & 19 for 21-nt phasiRNAs, and positions #1 & 22 for 24-nt phasiRNAs).

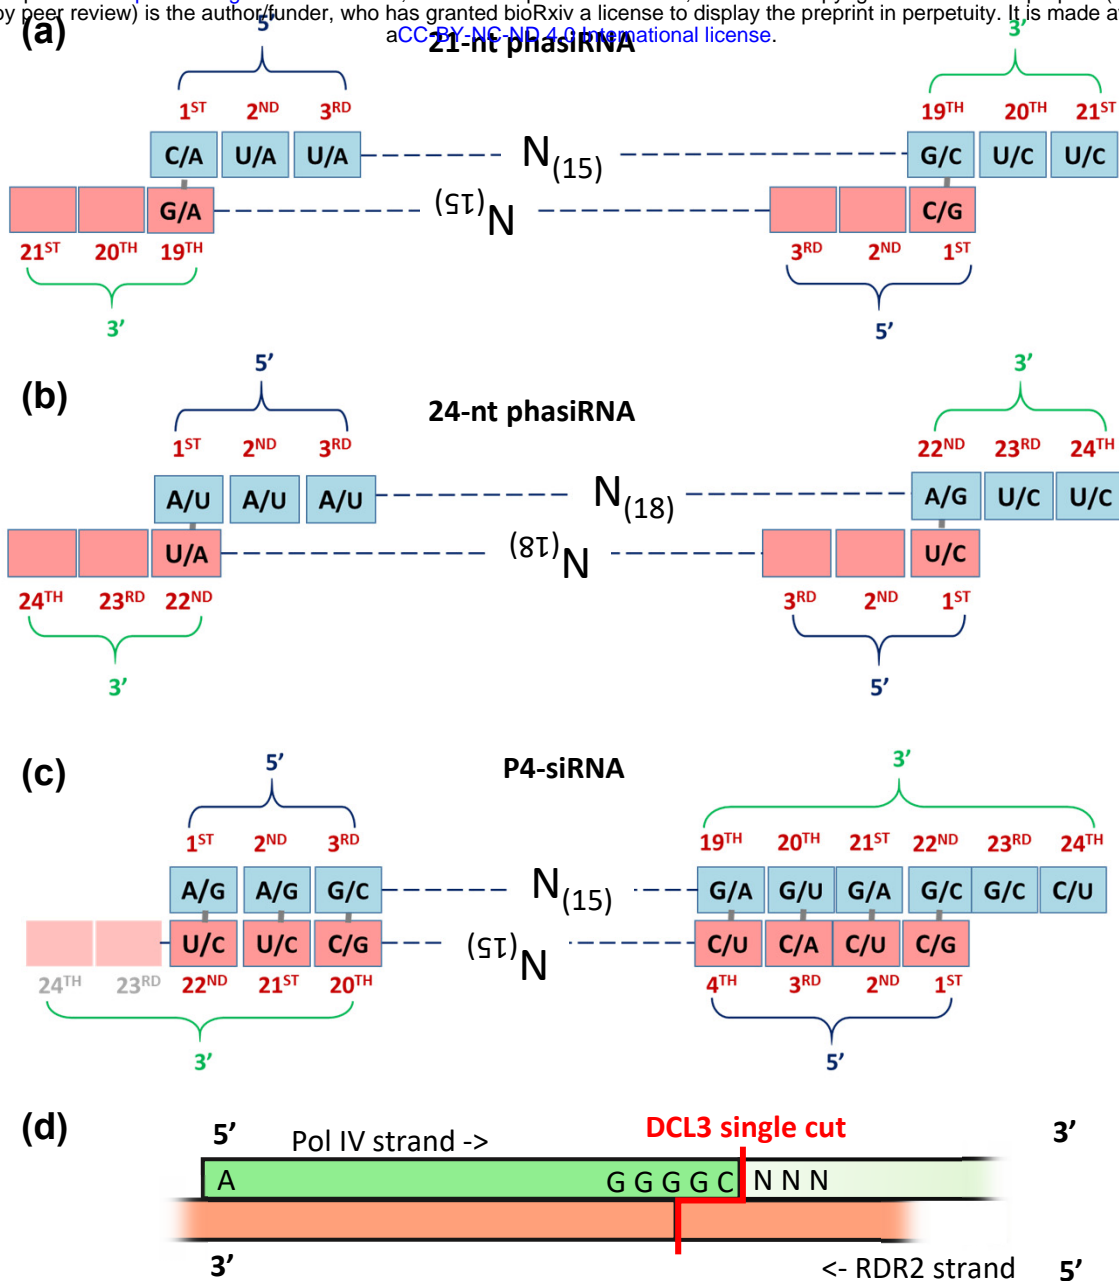

**Fig. 3 Nucleotide biases indicate one of the two siRNA precursor duplex small RNAs is preferentially retained.**

Schematic duplex structures of different types of plant small RNAs; the 5'- and 3'- ends are annotated and highlighted to emphasize the influence that a nucleotide bias on one strand has on the other due to pairing. The first three and the last three nucleotide positions are indicated from the 5'- and 3'-end positions, respectively, as the analyses focused on sequence composition biases at these positions; red numbering indicates the base position within the small RNA. Within each position, the top two most frequent nucleotides are indicated, with the first representing the most common occurring nucleotide; the sequences analyzed are the same as Fig. 2. (a) Position-specific nucleotide biases for abundant 21-nt reproductive phasiRNAs in rice and maize. (b) Position-specific nucleotide biases for 24-nt reproductive phasiRNAs from rice and maize. (c) Position-specific nucleotide biases for P4-siRNAs from rice and maize; for P4-siRNAs, the RDR2-derived bottom strand may terminate at the 22<sup>nd</sup> position, corresponding to the 5' end of the 'top', Pol IV-derived strand, although this is as-yet poorly characterized (indicated by lighter shading of the 23<sup>rd</sup> and 24<sup>th</sup> positions). (d) For comparison to panel (c), prior work by Zhai *et al.* (2015) and Blevins *et al.* (2015) described the P4R2 (Pol IV and RDR2-derived) precursors of 24-nt P4-siRNAs as ~26 to 42 nt RNAs; mapped onto the green Pol IV RNA are the biases observed here for P4-siRNAs. The 5' and 3' ends of the RDR2-derived strands are blurred because these ends have not yet been characterized.

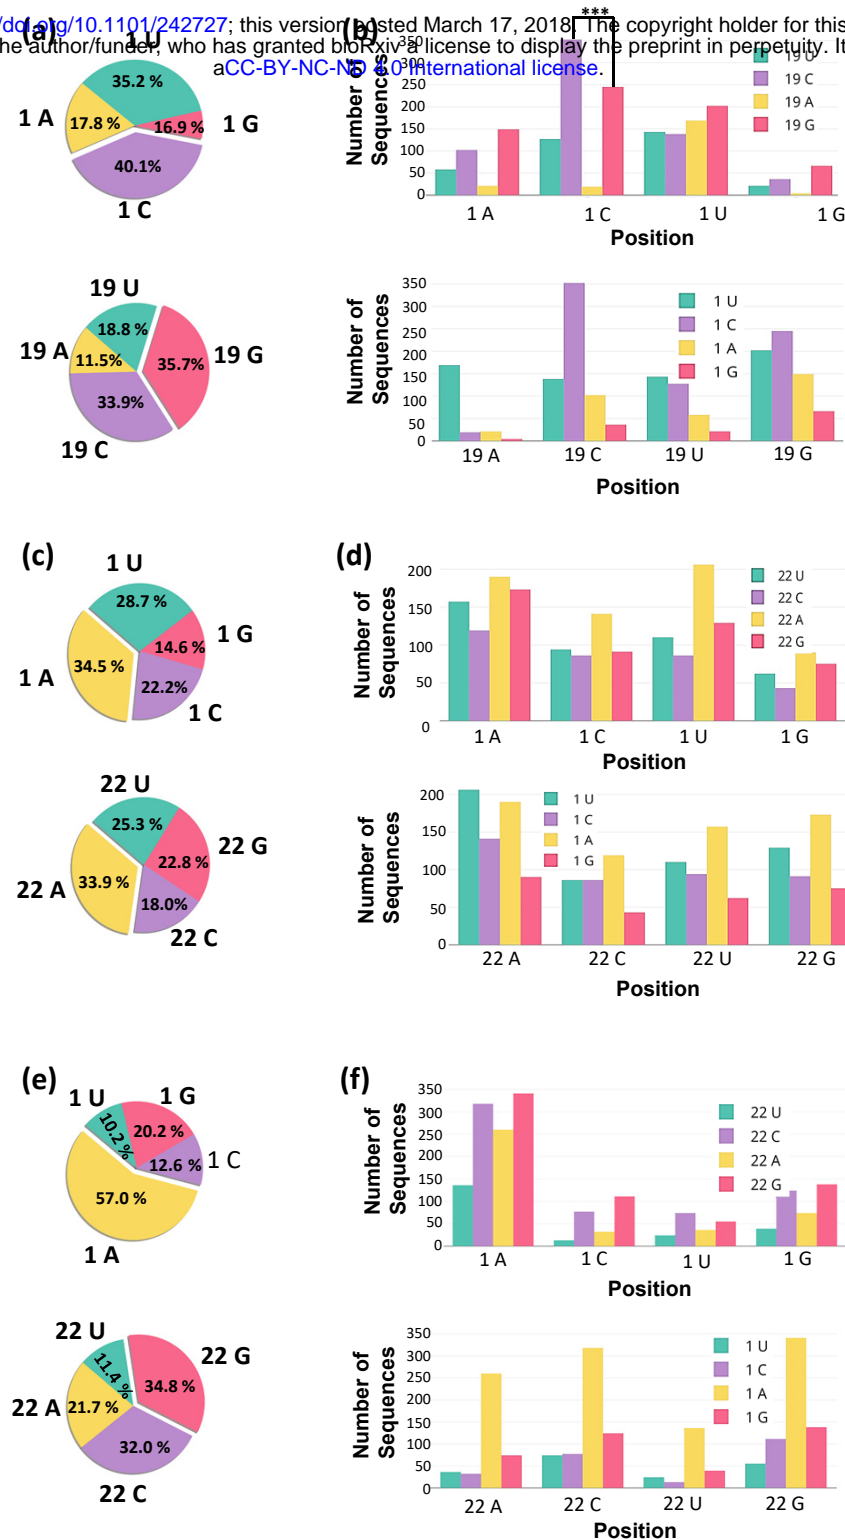

**Fig. 4 5' ends in phasiRNA duplexes influence the composition of 3'-proximal nucleotides.**

(a) The pie charts show the composition as a percent of all four nucleotides at the 1st (above) and at the 19th (below) positions in 21-nt reproductive phasiRNAs, combined from maize and rice. The predominant nucleotide is highlighted by separation from the other three. These data are the same as Fig. 2a (blue boxes in that figure), redrawn here for clarity. (b) Above, nucleotide composition at the 19th position of the 21-nt phasiRNAs shown in panel (a) when the 1st position is selected or fixed, as indicated on the X-axis. Below, the same analysis for the 1st position composition when the 19th position is selected or fixed. Significant differences are indicated (Student's t-test): \*\*\*,  $P \leq 0.001$ . (c) Pie charts show the composition as a percent of all four nucleotides at the 1st and at the 22nd positions in 24-nt phasiRNAs, combined from maize and rice. These data are the same as Fig. 2c, left panel (blue boxes in that figure), redrawn here for clarity. (d) Above, nucleotide composition at the 22nd position of the 24-nt phasiRNAs shown in panel (c) when the 1st position is selected or fixed, as indicated on the X-axis. Below, the same analysis for the 1st position composition when the 22nd position is selected or fixed. (e) Pie charts as above, for P4-siRNAs, combined from maize and rice. These data are the same as Fig. 2c, right panel, redrawn here for clarity. (f) Above, nucleotide composition at the 22nd position of the 24-nt P4-siRNAs shown in panel (e) when the 1st position is selected or fixed, as indicated on the X-axis. Below, the same analysis for the 1st position composition when the 22nd position is selected or fixed.

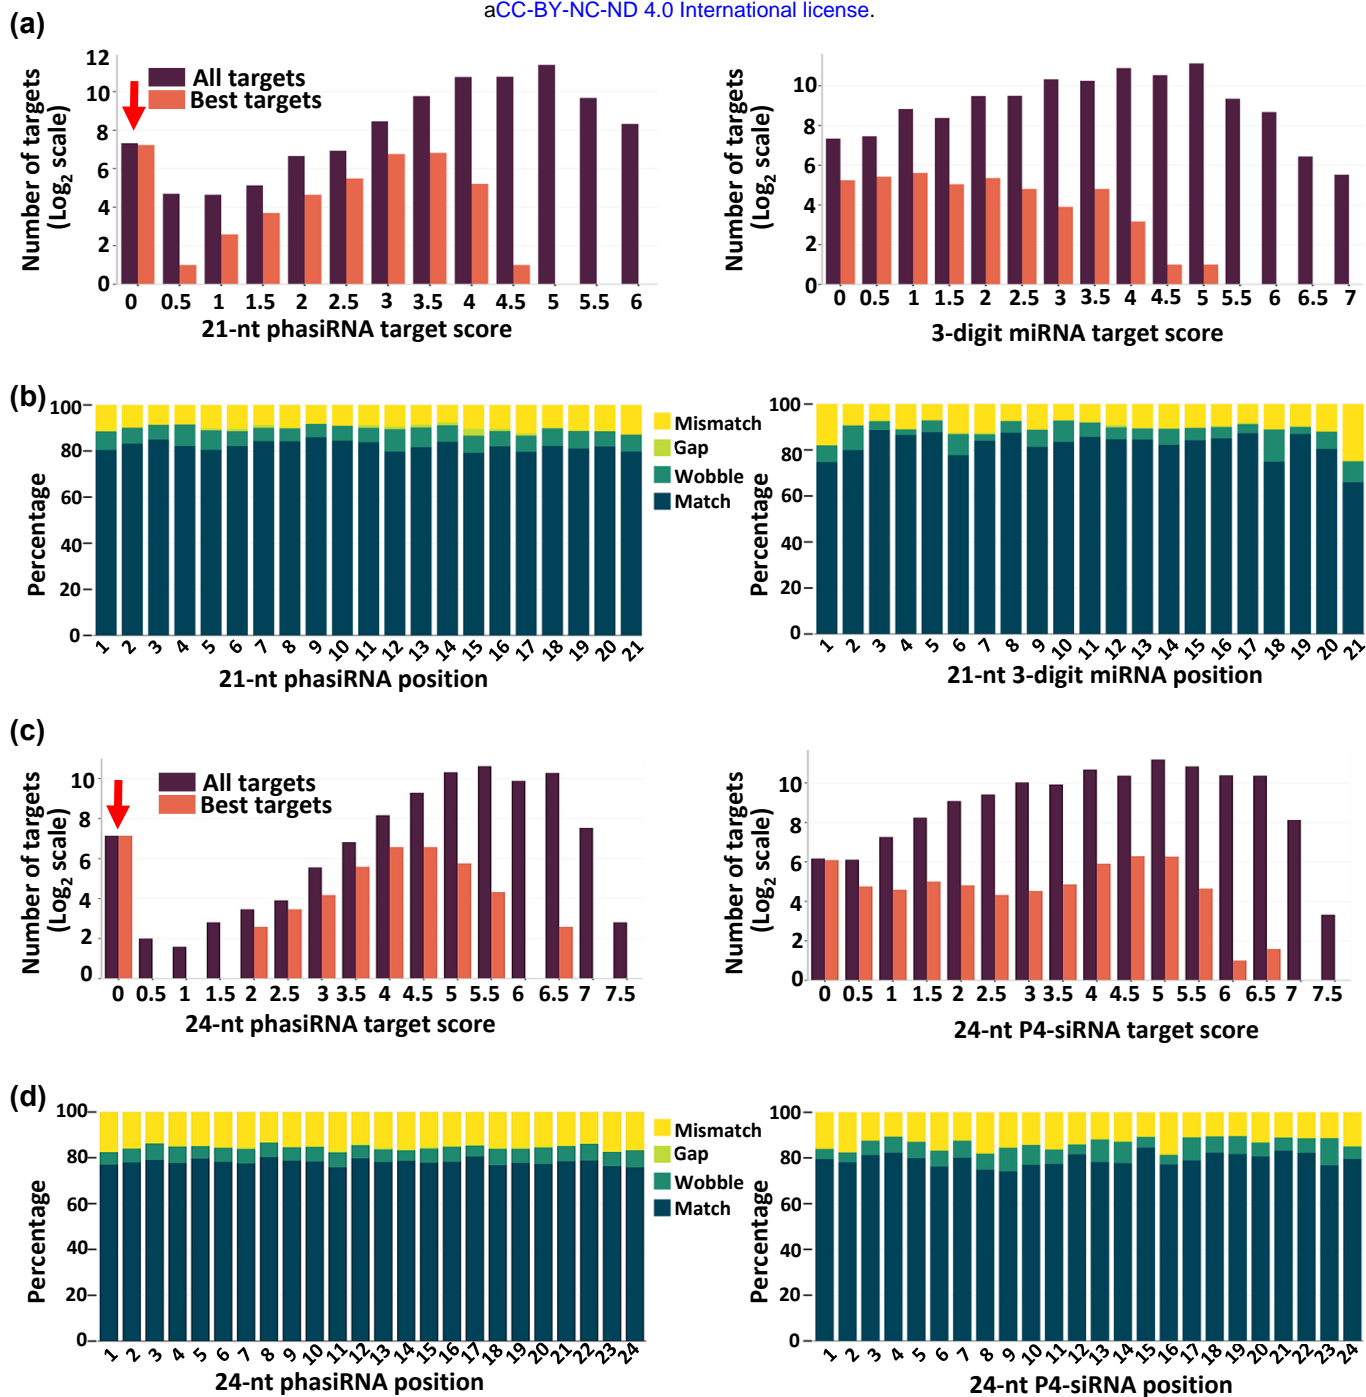

**Fig. 5 phasiRNA target prediction illustrates low binding affinity compared to other sRNAs to their targets due to sequence diversity.**

Target prediction for top 500 most abundant 21- and 24-nt phasiRNAs in rice, rice 3-digit miRNAs ( $n=288$ ), and top 500 most abundant P4-siRNAs in rice was performed using sPARTA. (a) The bar plots show target score distribution (as indicated on X-axis) for 21-nt phasiRNAs (at left) and 3-digit miRNAs (at right). Dark purple bars depict target score distribution of all targets of 21-nt phasiRNAs and 3-digit miRNAs. Orange bars depict target score distribution of only best targets (targets with a lowest target penalty score, meaning high degree of complementarity between phasiRNAs or miRNAs and their targets) of 21-nt phasiRNAs and 3-digit miRNAs. As indicated, Y-axis (number of targets) is transformed into  $\log_2$  scale and red arrow indicates potential self-targeting or *cis* interactions (with target score of 0, meaning perfect match). (b) The bar charts record the 21-nt phasiRNA-target interaction (at left) and 3-digit miRNA-target interaction (at right) for all targets with target score between 0.5 and 3.5, capturing binding pattern as a percent (Y-axis) of match, gap, wobble, and mismatch. (c) Bar plots showing target score distribution as above panel (a), for 24-nt phasiRNAs (at left) and 24-nt P4-siRNAs (at right). (d) As above panel (b), the bar charts indicating the binding pattern as a percent (Y-axis) of match, gap, wobble, and mismatch for 24-nt phasiRNA-target interaction (at left) and 24-nt P4-siRNAs-target interaction (at right) for all targets with target score between 0.5 and 5.
